# Supplementary material for: Trends of non-union and prescriptions for non-steroidal anti-inflammatory drugs in the United States, 1993–2012
Source: PubMed Central journal article supplement — Acta Orthop. 2015 Sep 4;86(5):632–7. doi: 10.3109/17453674.2015.1028860 (PMC4564789; doi:10.3109/17453674.2015.1028860), 2015-09-04
Supplement: ORT-86-632-s5993.pdf [file ORT-86-632-s5993.pdf]

## Supplementary article data

# Trends of non-union and prescriptions for non-steroidal anti-inflammatory drugs in the United States, 1993–2012

Zhong WANG and Timothy BHATTACHARYYA

Section of Clinical and Investigative Orthopedics, Clinical Trials and Outcomes Branch, Intramural Research Program, National Institute of Arthritis and Musculoskeletal and Skin Diseases, National Institutes of Health, Bethesda, Maryland, USA.

Correspondence: john.wang@nih.gov

Submitted 2012-11-05. Accepted 2015-02-03.

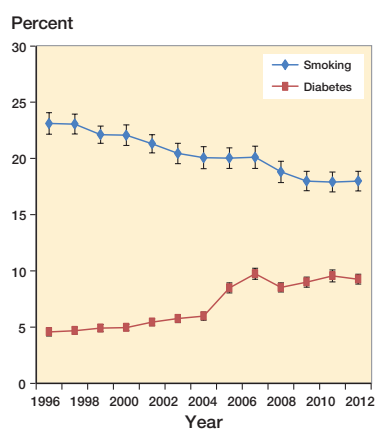

Figure 5. The prevalences of smoking and diabetes in the USA. Data from the MEPS, 2000–2012.
